# Supplementary material
Source: PubMed Central journal article supplement (PMC11195413)

### **Supplementary figure 1. iPSC characterisation of pluripotency.**

**(A)** Immunofluorescence staining at Day 16 of the Spontaneous in vitro differentiation protocol. SOX17 (SRY-BOX 17; endoderm-related), TUJ1 (Neuronal Class III  $\beta$ -Tubulin; ectoderm-related), and SMA (Alpha Smooth Muscle Actin; mesoderm-related) markers are shown. Nuclei were counterstained with DAPI. Scale bar, 500  $\mu$ m. n=1 biological replicate per line.

**(B)** Immunofluorescence for pluripotency markers NANOG, OCT4, TRA-1-60, TRA-1-81 in iPSC lines. Nuclei were counterstained with DAPI. Scale bar, 200  $\mu$ m. n=1 biological replicate per line.

**(C)** Epi-Pluri-Score testing for iPSC lines. DNA methylation profiles ( $\beta$ -values) in genes ANKRD46, C14orf115, and POU5F1 for all iPSC lines match profiles of pluripotent samples (red cloud). n=1 biological replicate per line.

**(D)** RT PCR in iPSC lines for expression of pluripotency markers SOX2, KLF4, NANOG, OCT4. H9 human embryonic stem cell (H9 hESC) line and human dermal fibroblasts were used as positive and negative controls, respectively. GAPDH was used as a housekeeping gene. n=1 biological replicate per line.

**(E)** RT PCR in iPSC lines for detection of Sendai virus genome and pluripotency transgenes. A positive (+ve) control (SeV DNA) and a negative control (cDNA from the H9 human embryonic stem cell line, H9 hESC) were also analysed. GAPDH was used as a housekeeping gene. n=1 biological replicate per line.

**(F)** Chromatograms from genomic DNA sequencing in BPAN iPSC lines. iPSC lines maintain disease-causing mutations. WDR45 disease-causing mutations are highlighted in the red rectangles. n=1 biological replicate per line.

**(G)** SNP array analysis of all iPSC lines used for downstream experiments, including the two isogenic controls. Representative images. All deletions/ gains in iPSCs used

for downstream experiments were small (<5Mb) and deemed as non-pathogenic by BlueFuse Multi. n=1 biological replicate per line.

**(H)** Alignment of wild type, patient 02 (c.19C>T), patient 03 (c.700C>T) and CRISPR corrected WDR45 genomic DNA (above) and amino acid (below) sequences. Premature protein truncation results from both c.19C>T and c.700C>T mutations. For each CRISPR-corrected line, three nucleotide substitutions have occurred after HDR (red rectangles). For both corrections, the first two are silent/ synonymous changes and, overall, the sequence leads to translation of a full-length WDR45 protein.

## **Supplementary Figure 2. Generation and basic characterisation of mDA model.**

**(A)** Protocol for A9-type mDA differentiation.

**(B)** Immunofluorescence for ventral midbrain progenitor-specific markers FOXA2 and LMX1A at Day 11 of mDA differentiation. Nuclei were counterstained with DAPI. Scale bar, 500  $\mu$ m. n=3 biological replicates per line.

**(C)** Quantification of FOXA2 and LMX1A abundance in Day 11 progenitors. n=3 biological replicates for all lines, 3 individual images from random areas of a well for each biological replicate. Percentages were calculated after manual counting of cells on ImageJ/Fiji (approximately 500 nuclei counted per image, followed by counting of cells also staining positive for FOXA2 and/or LMX1A).

**(D)** qRT-PCR at d11 for pluripotency markers OCT4 and NANOG, and midbrain related markers FOXA2, LMX1A, LMX1B, EN1, EN2, relative to housekeeping gene (GAPDH) and normalised to their respective iPSCs (n = 1 for each line, 3 technical replicates). Error bars indicate the Standard Error of Mean.

**(E)** qRT-PCR for TH, SNCA, NURR1, DAPT and DAT at day 65. mRNA values are relative to the housekeeping gene and normalised to the corresponding iPSCs (n = 3-5 per line).

**(F)** Cropped immunoblot of total WDR45 and beta actin protein expression at Day 11, and relevant quantification. n=3-4 biological replicates for each line.

Error bars represent the Standard Error of Mean. Statistics were calculated using ANOVA. Abbreviations: EBs= embryoid bodies. FC= fold change

### Supplementary Figure 3. RNASeq at Day 65 of differentiation

**(A)** List of differentially expressed genes when comparing Patient 01, Patient 02, Patient 03 versus Control 01, Control 02, CRISPR 01 and CRISPR 02 mDA neurons.

**(B)** ClueGO analysis of GO terms enrichment of differentially expressed genes, showing pie charts for cellular component (CC), and molecular function (MF).

**(C)** Volcano plots of differentially expressed genes when comparing Patient 02 and corresponding CRISPR line (CRISPR 01), as well as Patient 03 versus corresponding CRISPR line (CRISPR 02). The top 40 genes (as per lowest p-values) are labelled. Right: GO Term and KEGG pathway enrichment analysis depicting intracellular pathways jointly corrected in both Patients 02 and 03, when compared to CRISPR 01 and 02.

**(D)** List of intracellular pathways and genes corrected in both Patients 02 and 03, when compared to CRISPR 01 and 02.

**(E)** List of differentially expressed genes and involved pathways when comparing Patient 02, versus CRISPR 01 (Patient 02 Corrected) and Patient 02 Torin 1- and Digoxin-treated mDA neurons.

**(F)** ClueGO analysis of GO terms enrichment of differentially expressed genes, showing pie charts for cellular component (CC), and molecular function (MF).

n=3 for all lines, median TPM values analysed. Network graph nodes represent GO terms (the most significant are named) and edges indicate shared genes between GO terms. Functional groups of GO terms are indicated by the same colour. Pie charts show the percentages of each functional group representation. GO functional groups exhibiting statistically significant differences ( $p < 0.05$ ) are shown.

#### **Supplementary Figure 4. Defective autophagy flux in BPAN cells.**

(A) Patient and control fibroblasts imaged after 3-hour treatments with DMSO, autophagy flux inducers (Torin 1) and/ or inhibitors (Bafilomycin A1). Representative images. Cells were plated in 96-well plates at a density of 15,000 cells/well. n=5 biological replicates for each line. For each biological replicate, all lines were seeded on the same 96-well plate.

(B) Quantification of LC3 puncta/ nuclei in control and patient-derived fibroblasts. For statistical analysis, the Student's unpaired two tailed t-test was used. Error bars represent the Standard Error of Mean.

(C) Quantification of LC3 puncta/ nuclei in control and patient-derived neuronal progenitors, at basal (DMSO-treated) conditions. Experiment identical to the one depicted in Fig. 3A-B, but with more independent biological replicates (n=11). Additional replicates enhance the statistical significance of previous findings. For statistical analysis, the Student's unpaired two tailed t-test was used. Error bars represent the Standard Error of Mean.

(D) Day 11 ventral progenitors imaged after 3-hour autophagy flux induction or inhibition. Representative images. Cells were plated in 96-well plates at a density of 15,000 cells/well. n=7 independent differentiations/ biological replicates for each line. For each biological replicate, all 5 lines had the same start date of differentiation and were seeded on the same 96-well plate.

(E) Quantification of LC3 puncta/ nuclei in control and patient-derived neurons. For statistical analysis, the Student's unpaired two tailed t-test was used. Error bars represent the Standard Error of Mean.

## Supplementary Tables

**Supplementary Table 1. Fibroblast and corresponding iPSC lines used.**

| Fibroblast Identifier | iPSC clone used after characterisation    | WDR45 mutation                                    | Protein Effect    | Age at biopsy | Gender |
|-----------------------|-------------------------------------------|---------------------------------------------------|-------------------|---------------|--------|
| HDF7301               | HDF7301-05 (Control 01)                   | Healthy Control                                   | -                 | 13y           | F      |
| 582-202               | 582-06 (Control 02)                       | Healthy Control                                   | -                 | 1y10mo        | M      |
| BUCL01                | BPAN07 (Patient 01)                       | c.344+2T>A                                        | p.(Ile116Argfs*3) | 5y            | F      |
| 587-201A              | 587-02 (Patient 02)                       | c.19C>T                                           | p.Arg7*           | 19y8mo        | M      |
| 535-201               | 535-02 (Patient 03)                       | c.700C>T                                          | p.Arg234*         | 6y4mo         | F      |
|                       | R7-72 (CRISPR 01, Patient 02 Corrected)   | Substitution of c.19C>T with 'wild-type' sequence | Normal length     | 19y8mo        | M      |
|                       | R234-68 (CRISPR 02, Patient 03 Corrected) | Substitution of c.19C>T with 'wild-type' sequence | Normal length     | 6y4mo         | F      |

After characterisation of pluripotency, one iPSC clone from each line was used for downstream differentiations. The first patient line (Patient 01, BPAN07) carries a splice site mutation that leads to aberrant splicing and an early stop codon. Alignment of wild type & WDR45 c.344+2T>A amino acid sequences shows premature truncation of the protein by 246 amino acids with the inclusion of 2 aberrant residues (arginine and Alanine); p.(Ile116Argfs\*3) (data not shown). The other two patient lines (587-02 and 535-02) harbour nonsense pathogenic mutations leading to an early stop codon. In the isogenic controls R7-72 and R234-68, disease-causing mutations (in Patients 02 and 03, respectively) were corrected using CRISPR/Cas9-mediated genome editing (Supplementary Figure 1). Age- matched healthy control fibroblasts HDF-7301 were collected from the MRC Centre for Neuromuscular Disorders Biobank. Patient fibroblast line BUCL01 was ascertained from the University College London (UCL) Great Ormond Street Institute of Child Health (UCL GOS ICH), London, UK. Control fibroblast line 582-202 and patient lines 587-201A and 535-201 were obtained from Oregon Health and Science University (OHSU), Portland, Oregon, USA. Patient BUCL01 and control HDF-7301 fibroblasts were reprogrammed into iPSC at

UCL GOS ICH, while control 582-202 and patients 587-201A and 535-201 fibroblasts at the Wellcome Trust-Medical Research Council Cambridge Stem Cell Institute (Anne McLaren Laboratory for Regenerative Medicine, Cambridge, UK). Lines 587-02 and 535-02 (as well as the isogenic controls R7-72 and R234-68) were initially plated on Vitronectin XF (Stemcell Technologies)-coated plates and cultured in TeSR-E8 (StemCell Technologies). These lines were subsequently transferred to Matrigel/mTeSR1 culture conditions.

**Supplementary Table 2. sgRNA and HDR donor templates used for CRISPR/Cas9 genome editing in patient lines.**

| Patient 02 (iPSC clone 587-02); c.19C>T  |                                                                                                         |
|------------------------------------------|---------------------------------------------------------------------------------------------------------|
| sgRNA 1                                  | ATGACTCAACAGCCACTTTG AGG (reverse strand)                                                               |
| sgRNA2                                   | AGGCTGGTCACTCCTCAAAG TGG (forward strand)                                                               |
| HDR donor template                       | C*T*C*TCTCACTTTGGTCTTGGTTGAAACGCAGGC<br>TGGTCACTCCTCGTAATGGCTGTTGAGTCATGGTG<br>CAGGATTGTTCTCTGCAT*A*C*A |
| Patient 03 (iPSC clone 535-02); c.700C>T |                                                                                                         |
| sgRNA 1                                  | AAACTGGTGGAGCTGCGCTG AGG (reverse strand)                                                               |
| HDR donor template                       | C*A*T*ACCTGTGCTCACCACTAGAGGGTGGCAG<br>GGTCAGTGCCTCGTCTCAGCTCCACCAGTTTCTCC<br>TTGGATTGTGTGCAAAGAG*G*C*G  |

CRISPR/Cas9-mediated mutation correction in Patient 02 (clone 587-02) and Patient 03 (clone 535-02) iPSC lines was performed at the Wellcome Trust-Medical Research Council Cambridge Stem Cell Institute. sgRNA= single guide RNA, HDR= Homology-Directed Repair



### Supplementary Table 3. PCR primers for WDR45 gene sequencing.

| Exon                     | Size (bp) | Annealing Temp | Primer Sequence |                       |
|--------------------------|-----------|----------------|-----------------|-----------------------|
| 3 (Coding Exon 1)        | 261       | 55°C           | 3F              | TCCCAAAGTGCTGGATTAC   |
|                          |           |                | 3R              | TTCCTCCCACAAGGGTACAG  |
| 4-5 (Coding Exons 2-3)   | 429       | 60°C           | 4-5F            | CTGTACCCTTGTTGGAGGAA  |
|                          |           |                | 4-5R            | CCAGGAATCCGAGAAATCTG  |
| 6-7 (Coding Exons 4-5)   | 505       | 60°C           | 6-7F            | GCCCCTTACCCTAAACCTTG  |
|                          |           |                | 6-7R            | TGAGTGTGAGCATCTCCCTG  |
| 8-9 (Coding Exons 6-7)   | 596       | 60°C           | 8-9F            | TCTGGTCTCATCCAGCTCT   |
|                          |           |                | 8-9R            | CAGAGGAAAGGAGGAGTCGTG |
| 10-11 (Coding Exons 8-9) | 707       | 60°C           | 10-11F          | GTCTGCTCCATTACCGATCA  |
|                          |           |                | 10-11R          | GCTGTCCCCTTACTGATGA   |
| 12 (Coding Exon 10)      | 634       | 60°C           | 12F             | AGATGCCTGAGAGGACTGGA  |
|                          |           |                | 12R             | AATCCCCAGGTTGGATTAGG  |

Tm= annealing temperature. F= forward, R= reverse

### Supplementary Table 4. Primers used for WDR45 cDNA sequencing.

| Exons | Expected size | Primers used |                                         | Coverage                          |
|-------|---------------|--------------|-----------------------------------------|-----------------------------------|
| 1-4   | 391bp         | F            | GACTCAACAGCCACTTCGAGGA                  | Beginning of Exon 3 to mid-Exon 7 |
|       |               | R            | GTCGGGGAAGGAGTACACAT                    |                                   |
| 5-7   | 465bp         | F            | AGCTAAGCGCGAGAAAGCGTTACCTTACCAAGCCAG    | Late Exon 6 to Exon 10            |
|       |               | R            | GCTTACCGCTCAACCGTTCAGAGGAAAGGAGGAGTCGTG |                                   |
| 8-10  | 675bp         | F            | GTGTA CTCTTCCCCGACAA                    | Mid-exon 7 to mid-exon 12         |
|       |               | R            | CGTCGAAAGCCTCTCTGTTG                    |                                   |

F= forward, R= reverse

**Supplementary Table 5. Primer pairs for detection of pluripotency marker expression via RT PCR.**

| Primer name | Sequence (5'-3')           | PCR product size (bp) |
|-------------|----------------------------|-----------------------|
| GAPDH F     | ATCCCATCACCATCTTCCAG       | 382                   |
| GAPDH R     | CCATCAGCCACAGTTTCC         |                       |
| OCT4 F      | CGAAACCCCACTGCAGCAG        | 402                   |
| OCT4 R      | CCTGGCACA AACTCCAGGTTT     |                       |
| SOX2 F      | GGGAAATGGGAGGGGTGCAAAAGAGG | 151                   |
| SOX2 R      | TTGCGTGAGTGTGGATGGGATTGGTG |                       |
| NANOG F     | CAGCCCCGATTCTTCCAGTCCC     | 343                   |
| NANOG R     | CGGAAGATTTCCAGTCGGGTTCAAC  |                       |
| c-MYC F     | GCGTCCTGGGAAGGGAGATCCGGAGC | 328                   |
| c-MYC R     | TTGAGGGGCATCGTCGGGGAGGCTG  |                       |
| KLF4 F      | ATATCCCGCCGTGGGTGAAAGTTC   | 243                   |
| KLF4 R      | ACTCAGCCATGGACTGGAGCATCC   |                       |

F= forward, R= reverse

**Supplementary Table 6. Primers used for Sendai Virus Clearance-related RT PCR experiments.**

| Primer name | Sequence (5'-3')               | PCR product size (bp) |
|-------------|--------------------------------|-----------------------|
| SeV F       | GGATCACTAGGTGATATCGAGC         | 181                   |
| SeV R       | ACCAGACAAGAGTTTAAAGAGATATGTATC |                       |
| SeV SOX2 F  | ATGCA CCGCTACGACGTGAGCGC       | 451                   |
| SeV SOX2 R  | AATGTATCGAAGGTGCTCAA           |                       |
| SeV KLF4 F  | TTCTGCATGCCAGAGGAGCCC          | 410                   |
| SeV KLF4 R  | AATGTATCGAAGGTGCTCAA           |                       |
| SeV c-MYC F | TAACTGACTAGCAGGCTTGTGCG        | 532                   |
| SeV c-MYC R | TCCACATACAGTCTGGATGATGATG      |                       |
| SeV OCT4 F  | CCCGAAA GAGAAA GCGAACCA G      | 483                   |
| SeV OCT4 R  | AATGTATCGAAGGTGCTCAA           |                       |
| GAPDH F     | ATCCCATCACCATCTTCCAG           | 382                   |
| GAPDH R     | CCATCAGCCACAGTTTCC             |                       |

F= forward, R= reverse, SeV= Sendai Virus

### Supplementary Table 7. qRT PCR primers used for Day 11 and Day 65 characterisation.

| qRT PCR primers |                         |
|-----------------|-------------------------|
| Primer name     | Sequence (5'-3')        |
| GAPDH F         | TTGAGGTCAATGAAGGGGTC    |
| GAPDH R         | GAAGGTGAAGGTGGAGTCA     |
| FOXA2 F         | CCGTTCTCCATCAACAACCT    |
| FOXA2 R         | GGGGTAGTGATCACCTGTT     |
| EN1 F           | CGTGGCTTACTCCCCATTTA    |
| EN1 R           | TCTCGCTGTCTCCCTCTC      |
| EN2 F           | CCTCCTGCTCCTCTTTCTT     |
| EN2 R           | GACGCAGACGATGTATGCAC    |
| LMX1A F         | CGCATCGTTTCTTCTCCTCT    |
| LMX1A R         | CAGACAGACTTGGGGCTCA C   |
| LMX1B F         | CTTAACCAGCCTCAGCGACT    |
| LMX1B R         | TCAGGAGGCGAAGTAGGAAC    |
| OCT4 F          | TCTCCAGGTTGCCTCTCACT    |
| OCT4 R          | GTGGAGGAAGCTGACAACAA    |
| NANOG F         | TTGGGACTGGTGGAGAATC     |
| NANOG R         | GATTTGTGGCCTGAAAGAAA    |
| TH F            | CGGGCTTCTCGGACCAAGGTGTA |
| TH R            | CTCCTCGGCGGTGTA CTCCACA |
| DAT F           | TCACCAACGGTGGCATCTAC    |
| DAT R           | CACTCCGATGGCTTCGATGA    |
| NURR1 F         | TGCGAGCAGAGAGGGAGTAG    |
| NURR1 R         | TCGACATTTCTGCCTTCTCCTG  |
| SNCA F          | GGAGTGGCCATTCGACGAC     |
| SNCA R          | CCTGCTGCTTCTGCCACAC     |
| MAPT F          | CTCGCATGGTCAATAAAGCAA   |
| MAPT R          | GGGTTTTGCTGGAATCCTGGT   |
| WDR45 F         | TGCGCCATGACAAGATCGT     |
| WDR45 R         | ACTCAACA GCTTTCGGGGAT   |

The following protocol was used on the StepOnePlus Real-Time PCR System: 1 cycle of 5 min (initial denaturation step) followed by 40 cycles at 95°C for 15 sec (denaturation) and at 60°C for 60 sec (annealing, extension). Abbreviations: F= forward; R= reverse

### Supplementary Table 8. Primary and corresponding secondary antibodies used for immunofluorescence and western blotting experiments.

| Western Blot Antibodies                            |                                                                                    |          |
|----------------------------------------------------|------------------------------------------------------------------------------------|----------|
| Primary Antibody                                   | Company/ Catalogue Number                                                          | Dilution |
| Beta Actin mouse monoclonal antibody (clone AC-15) | Sigma (A1978)                                                                      | 1:4,000  |
| LC3B rabbit polyclonal antibody                    | Sigma (L7543)                                                                      | 1:1,000  |
| WDR45 rabbit monoclonal antibody                   | Gift from Professor Sharon Tooze's laboratory, Francis Crick Institute, London, UK | 1:250    |
| WDR45 rabbit polyclonal antibody                   | Proteintech (19194-1-AP)                                                           | 1:2,000  |
| Secondary Antibody                                 | Company/ Catalogue Number                                                          | Dilution |
| Anti-mouse IgG, HRP-linked Antibody                | Cell signalling technology (7076)                                                  | 1:5,000  |
| Anti-rabbit IgG, HRP-linked Antibody               | Cell signalling technology (7074)                                                  | 1:5,000  |
| Immunofluorescence Antibodies                      |                                                                                    |          |
| Primary Antibody                                   | Company/ Catalogue Number                                                          | Dilution |
| FOXA2 mouse monoclonal antibody                    | BD Pharmigen (561580)                                                              | 1:500    |
| LMX1A rabbit polyclonal antibody                   | Millipore (AB10533)                                                                | 1:2,000  |
| MAP2 Mouse monoclonal antibody                     | Sigma                                                                              | 1:400    |
| NANOG Mouse monoclonal antibody                    | Millipore                                                                          | 1:500    |
| OCT4 Mouse monoclonal antibody                     | Santa Cruz                                                                         | 1:50     |
| SMA Rabbit monoclonal antibody                     | Abcam                                                                              | 1:100    |
| SOX17 Goat polyclonal antibody                     | R&D Systems                                                                        | 1:200    |
| TH Chicken polyclonal antibody                     | Aves                                                                               | 1:400    |
| TRA-1-60 Mouse monoclonal antibody                 | Santa Cruz                                                                         | 1:200    |
| TRA-1-81 Mouse monoclonal antibody                 | Millipore                                                                          | 1:200    |
| TUJ1 Mouse monoclonal antibody                     | BioLegend                                                                          | 1:400    |
| Secondary Antibody                                 | Company/ Catalogue Number                                                          | Dilution |
| Alexa Fluor 488 Donkey Anti-Goat IgG               | ThermoFisher (A-11055)                                                             | 1:400    |
| Alexa Fluor 488 Goat Anti-Mouse IgG                | ThermoFisher (A-11001)                                                             | 1:400    |
| Alexa Fluor 488 Goat Anti-Rabbit IgG               | ThermoFisher (A-11008)                                                             | 1:400    |
| Alexa Fluor 594 Goat Anti-Chicken IgG              | ThermoFisher (A-11042)                                                             | 1:400    |
| Alexa Fluor 594 Goat Anti-Mouse IgM                | ThermoFisher (A-21044)                                                             | 1:400    |
| Alexa Fluor 594 Goat Anti-Rabbit IgG               | ThermoFisher (A-11012)                                                             | 1:400    |
| High Content Immunofluorescence Antibodies         |                                                                                    |          |
| Primary Antibody                                   | Company/ Catalogue Number                                                          | Dilution |
| LC3B rabbit monoclonal antibody (clone D11)        | Cell Signalling Technology (3868S)                                                 | 1:200    |
| P62/SQSTM1 rabbit polyclonal antibody              | Sigma (P0067)                                                                      | 1:1,000  |
| Secondary Antibody                                 | Company/ Catalogue Number                                                          | Dilution |
| Alexa Fluor 488 Goat Anti-Mouse IgG                | ThermoFisher (A-11001)                                                             | 1:400    |
| Alexa Fluor 488 Goat Anti-Rabbit IgG               | ThermoFisher (A-11008)                                                             | 1:400    |

**Supplementary Table 9. Hits from Prestwick screen with the 200 highest z-scores.1.**

- Meyer E, Kurian MA, Hayflick SJ. Neurodegeneration with Brain Iron Accumulation: Genetic Diversity and Pathophysiological Mechanisms. *Annu Rev Genomics Hum Genet* **16**, 257-279 (2015).
2. Hayflick SJ, Kurian MA, Hogarth P. Neurodegeneration with brain iron accumulation. *Handbook of clinical neurology* **147**, 293-305 (2018).
  3. Hayflick SJ, *et al.* beta-Propeller protein-associated neurodegeneration: a new X-linked dominant disorder with brain iron accumulation. *Brain* **136**, 1708-1717 (2013).
  4. Haack TB, *et al.* Exome sequencing reveals de novo WDR45 mutations causing a phenotypically distinct, X-linked dominant form of NBIA. *American journal of human genetics* **91**, 1144-1149 (2012).
  5. Saitsu H, *et al.* De novo mutations in the autophagy gene WDR45 cause static encephalopathy of childhood with neurodegeneration in adulthood. *Nature genetics* **45**, 445-449, 449e441 (2013).
  6. Zhao YG, *et al.* The autophagy gene Wdr45/Wipi4 regulates learning and memory function and axonal homeostasis. *Autophagy* **11**, 881-890 (2015).
  7. Bakula D, *et al.* WIPI3 and WIPI4 beta-propellers are scaffolds for LKB1-AMPK-TSC signalling circuits in the control of autophagy. **8**, 15637 (2017).
  8. Proikas-Cezanne T, Takacs Z, Donnes P, Kohlbacher O. WIPI proteins: essential PtdIns3P effectors at the nascent autophagosome. *Journal of cell science* **128**, 207-217 (2015).
  9. Paudel R, *et al.* Neuropathology of Beta-propeller protein associated neurodegeneration (BPAN): a new tauopathy. *Acta neuropathologica communications* **3**, 39 (2015).
  10. Teinert J, Behne R, Wimmer M, Ebrahimi-Fakhari D. Novel insights into the clinical and molecular spectrum of congenital disorders of autophagy. *Journal of inherited metabolic disease*, (2019).
  11. Choi AM, Ryter SW, Levine B. Autophagy in human health and disease. *The New England journal of medicine* **368**, 651-662 (2013).
  12. Stead ER, *et al.* Agephagy - Adapting Autophagy for Health During Aging. *Frontiers in cell and developmental biology* **7**, 308 (2019).
  13. Agrotis A, Ketteler R. On ATG4B as Drug Target for Treatment of Solid Tumours-The Knowns and the Unknowns. *Cells* **9**, (2019).
  14. Agrotis A, von Chamier L, Oliver H, Kiso K, Singh T, Ketteler R. Human ATG4 autophagy proteases counteract attachment of ubiquitin-like LC3/GABARAP

- proteins to other cellular proteins. *The Journal of biological chemistry* **294**, 12610-12621 (2019).
15. Baskaran S, Ragusa MJ, Boura E, Hurley JH. Two-site recognition of phosphatidylinositol 3-phosphate by PROPPINs in autophagy. *Molecular cell* **47**, 339-348 (2012).
  16. Smith TF, Gaitatzes C, Saxena K, Neer EJ. The WD repeat: a common architecture for diverse functions. *Trends Biochem Sci* **24**, 181-185 (1999).
  17. Li D, Roberts R. WD-repeat proteins: structure characteristics, biological function, and their involvement in human diseases. *Cell Mol Life Sci* **58**, 2085-2097 (2001).
  18. Lu Q, *et al.* The WD40 repeat PtdIns(3)P-binding protein EPG-6 regulates progression of omegasomes to autophagosomes. *Dev Cell* **21**, 343-357 (2011).
  19. Obara K, Sekito T, Niimi K, Ohsumi Y. The Atg18-Atg2 complex is recruited to autophagic membranes via phosphatidylinositol 3-phosphate and exerts an essential function. *The Journal of biological chemistry* **283**, 23972-23980 (2008).
  20. Nakatogawa H, Suzuki K, Kamada Y, Ohsumi Y. Dynamics and diversity in autophagy mechanisms: lessons from yeast. *Nature reviews Molecular cell biology* **10**, 458-467 (2009).
  21. Wan H, *et al.* WDR45 contributes to neurodegeneration through regulation of ER homeostasis and neuronal death. *Autophagy*, 1-17 (2019).
  22. Seibler P, *et al.* Iron overload is accompanied by mitochondrial and lysosomal dysfunction in WDR45 mutant cells. *Brain*, (2018).
  23. Fusaki N, Ban H, Nishiyama A, Saeki K, Hasegawa M. Efficient induction of transgene-free human pluripotent stem cells using a vector based on Sendai virus, an RNA virus that does not integrate into the host genome. *Proceedings of the Japan Academy Series B, Physical and biological sciences* **85**, 348-362 (2009).
  24. Gasteiger E, Gattiker A, Hoogland C, Ivanyi I, Appel RD, Bairoch A. ExpASY: The proteomics server for in-depth protein knowledge and analysis. *Nucleic acids research* **31**, 3784-3788 (2003).
  25. Lenz M, *et al.* Epigenetic biomarker to support classification into pluripotent and non-pluripotent cells. *Scientific reports* **5**, 8973 (2015).
  26. Ng J, *et al.* Gene therapy restores dopamine transporter expression and ameliorates pathology in iPSC and mouse models of infantile parkinsonism. *Science translational medicine* **13**, (2021).

27. Kirkeby A, *et al.* Generation of regionally specified neural progenitors and functional neurons from human embryonic stem cells under defined conditions. *Cell reports* **1**, 703-714 (2012).
28. Tomoda K, *et al.* Derivation conditions impact X-inactivation status in female human induced pluripotent stem cells. *Cell Stem Cell* **11**, 91-99 (2012).
29. Tchieu J, *et al.* Female human iPSCs retain an inactive X chromosome. *Cell Stem Cell* **7**, 329-342 (2010).
30. Bar S, Seaton LR, Weissbein U, Eldar-Geva T, Benvenisty N. Global Characterization of X Chromosome Inactivation in Human Pluripotent Stem Cells. *Cell reports* **27**, 20-29.e23 (2019).
31. Mekhoubad S, Bock C, de Boer AS, Kiskinis E, Meissner A, Eggan K. Erosion of dosage compensation impacts human iPSC disease modeling. *Cell Stem Cell* **10**, 595-609 (2012).
32. Comertpay S, *et al.* Evaluation of clonal origin of malignant mesothelioma. *J Transl Med* **12**, 301 (2014).
33. Love MI, Huber W, Anders S. Moderated estimation of fold change and dispersion for RNA-seq data with DESeq2. *Genome biology* **15**, 550 (2014).
34. Mi H, Muruganujan A, Thomas PD. PANTHER in 2013: modeling the evolution of gene function, and other gene attributes, in the context of phylogenetic trees. *Nucleic acids research* **41**, D377-386 (2013).
35. The Gene Ontology resource: enriching a GOld mine. *Nucleic acids research* **49**, D325-d334 (2021).
36. Ashburner M, *et al.* Gene ontology: tool for the unification of biology. The Gene Ontology Consortium. *Nature genetics* **25**, 25-29 (2000).
37. Kanehisa M, Furumichi M, Tanabe M, Sato Y, Morishima K. KEGG: new perspectives on genomes, pathways, diseases and drugs. *Nucleic acids research* **45**, D353-d361 (2017).
38. Kanehisa M, Goto S, Furumichi M, Tanabe M, Hirakawa M. KEGG for representation and analysis of molecular networks involving diseases and drugs. *Nucleic acids research* **38**, D355-360 (2010).
39. Kanehisa M, Sato Y, Kawashima M, Furumichi M, Tanabe M. KEGG as a reference resource for gene and protein annotation. *Nucleic acids research* **44**, D457-462 (2016).
40. Jiao X, *et al.* DAVID-WS: a stateful web service to facilitate gene/protein list analysis. *Bioinformatics* **28**, 1805-1806 (2012).

41. Mitre M, Mariga A, Chao MV. Neurotrophin signalling: novel insights into mechanisms and pathophysiology. *Clin Sci (Lond)* **131**, 13-23 (2017).
42. Chen X, Yu C, Kang R, Tang D. Iron Metabolism in Ferroptosis. *Front Cell Dev Biol* **8**, 590226 (2020).
43. Wu Q, Maniatis T. A striking organization of a large family of human neural cadherin-like cell adhesion genes. *Cell* **97**, 779-790 (1999).
44. De Wolf V, *et al.* A complex Xp11.22 deletion in a patient with syndromic autism: exploration of FAM120C as a positional candidate gene for autism. *American journal of medical genetics Part A* **164a**, 3035-3041 (2014).
45. Nishimoto S, Kusakabe M, Nishida E. Requirement of the MEK5-ERK5 pathway for neural differentiation in *Xenopus* embryonic development. *EMBO Rep* **6**, 1064-1069 (2005).
46. Zou J, *et al.* Targeted deletion of ERK5 MAP kinase in the developing nervous system impairs development of GABAergic interneurons in the main olfactory bulb and behavioral discrimination between structurally similar odorants. *The Journal of neuroscience : the official journal of the Society for Neuroscience* **32**, 4118-4132 (2012).
47. Hetz C, Papa FR. The Unfolded Protein Response and Cell Fate Control. *Molecular cell* **69**, 169-181 (2018).
48. Brunetti-Pierri N, Scaglia F. GM1 gangliosidosis: review of clinical, molecular, and therapeutic aspects. *Molecular genetics and metabolism* **94**, 391-396 (2008).
49. Mohammad SS, *et al.* Magnetic resonance imaging pattern recognition in childhood bilateral basal ganglia disorders. *Brain Commun* **2**, fcaa178 (2020).
50. Regier DS, *et al.* MRI/MRS as a surrogate marker for clinical progression in GM1 gangliosidosis. *American journal of medical genetics Part A* **170**, 634-644 (2016).
51. Kukkonen JP. Orexin/Hypocretin Signaling. *Curr Top Behav Neurosci* **33**, 17-50 (2017).
52. Wilson JL, *et al.* Consensus clinical management guideline for beta-propeller protein-associated neurodegeneration. *Developmental medicine and child neurology*, (2021).
53. Lee JR. Protein tyrosine phosphatase PTPRT as a regulator of synaptic formation and neuronal development. *BMB Rep* **48**, 249-255 (2015).
54. Nam J, Mah W, Kim E. The SALM/Lrfr family of leucine-rich repeat-containing cell adhesion molecules. *Semin Cell Dev Biol* **22**, 492-498 (2011).



55. Pei YP, *et al.* ICAM5 as a Novel Target for Treating Cognitive Impairment in Fragile X Syndrome. *The Journal of neuroscience : the official journal of the Society for Neuroscience* **40**, 1355-1365 (2020).
56. Fernandez RF, *et al.* Acyl-CoA synthetase 6 enriches the neuroprotective omega-3 fatty acid DHA in the brain. *Proceedings of the National Academy of Sciences of the United States of America* **115**, 12525-12530 (2018).
57. Gottlieb RA, Andres AM, Sin J, Taylor DP. Untangling autophagy measurements: all fluxed up. *Circ Res* **116**, 504-514 (2015).
58. Yoshii SR, Mizushima N. Monitoring and Measuring Autophagy. *International journal of molecular sciences* **18**, (2017).
59. Mauthe M, *et al.* Chloroquine inhibits autophagic flux by decreasing autophagosome-lysosome fusion. *Autophagy* **14**, 1435-1455 (2018).
60. Pelz O, Gilsdorf M, Boutros M. web cellHTS2: a web-application for the analysis of high-throughput screening data. *BMC Bioinformatics* **11**, 185 (2010).
61. Waguri S, Komatsu M. Biochemical and morphological detection of inclusion bodies in autophagy-deficient mice. *Methods Enzymol* **453**, 181-196 (2009).
62. Kraja AT, *et al.* Associations of Mitochondrial and Nuclear Mitochondrial Variants and Genes with Seven Metabolic Traits. *American journal of human genetics* **104**, 112-138 (2019).
63. Liang C, *et al.* Autophagic and tumour suppressor activity of a novel Beclin1-binding protein UVRAG. *Nature cell biology* **8**, 688-699 (2006).
64. Agrotis A, Pengo N, Burden JJ, Ketteler R. Redundancy of human ATG4 protease isoforms in autophagy and LC3/GABARAP processing revealed in cells. *Autophagy* **15**, 976-997 (2019).
65. Barral S, Kurian MA. Utility of Induced Pluripotent Stem Cells for the Study and Treatment of Genetic Diseases: Focus on Childhood Neurological Disorders. *Frontiers in molecular neuroscience* **9**, 78 (2016).
66. Xiong Q, *et al.* WDR45 Mutation Impairs the Autophagic Degradation of Transferrin Receptor and Promotes Ferroptosis. *Front Mol Biosci* **8**, 645831 (2021).
67. Fu XH, *et al.* COL1A1 affects apoptosis by regulating oxidative stress and autophagy in bovine cumulus cells. *Theriogenology* **139**, 81-89 (2019).
68. Paiva I, *et al.* Alpha-synuclein deregulates the expression of COL4A2 and impairs ER-Golgi function. *Neurobiology of disease* **119**, 121-135 (2018).

69. Tang ME, *et al.* Matrix metalloproteinase-degraded type I collagen is associated with APOE/TOMM40 variants and preclinical dementia. *Neurology Genetics* **6**, e508 (2020).
70. Cescon M, Chen P, Castagnaro S, Gregorio I, Bonaldo P. Lack of collagen VI promotes neurodegeneration by impairing autophagy and inducing apoptosis during aging. *Aging (Albany NY)* **8**, 1083-1101 (2016).
71. Stanga D, Zhao Q, Milev MP, Saint-Dic D, Jimenez-Mallebrera C, Sacher M. TRAPPC11 functions in autophagy by recruiting ATG2B-WIP14/WDR45 to preautophagosomal membranes. *Traffic (Copenhagen, Denmark)* **20**, 325-345 (2019).
72. Chang CY, *et al.* Induced Pluripotent Stem Cell (iPSC)-Based Neurodegenerative Disease Models for Phenotype Recapitulation and Drug Screening. *Molecules* **25**, (2020).
73. Garcia-Leon JA, Vitorica J, Gutierrez A. Use of human pluripotent stem cell-derived cells for neurodegenerative disease modeling and drug screening platform. *Future Med Chem* **11**, 1305-1322 (2019).
74. Little D, Ketteler R, Gissen P, Devine MJ. Using stem cell-derived neurons in drug screening for neurological diseases. *Neurobiol Aging* **78**, 130-141 (2019).
75. Papandreou A, Luft C, Barral S, Kriston-Vizi J, Kurian MA, Ketteler R. Automated high-content imaging in iPSC-derived neuronal progenitors. *SLAS Discov* **28**, 42-51 (2023).
76. Celsi F, *et al.* Mitochondria, calcium and cell death: a deadly triad in neurodegeneration. *Biochimica et biophysica acta* **1787**, 335-344 (2009).
77. Guo T, Zhang D, Zeng Y, Huang TY, Xu H, Zhao Y. Molecular and cellular mechanisms underlying the pathogenesis of Alzheimer's disease. *Molecular neurodegeneration* **15**, 40 (2020).
78. Moore DJ, West AB, Dawson VL, Dawson TM. Molecular pathophysiology of Parkinson's disease. *Annual review of neuroscience* **28**, 57-87 (2005).
79. Hansen TE, Johansen T. Following autophagy step by step. *BMC Biol* **9**, 39 (2011).
80. Hundeshagen P, Hamacher-Brady A, Eils R, Brady NR. Concurrent detection of autolysosome formation and lysosomal degradation by flow cytometry in a high-content screen for inducers of autophagy. *BMC Biol* **9**, 38 (2011).
81. Liu Y, Levine B. Autosis and autophagic cell death: the dark side of autophagy. *Cell Death Differ* **22**, 367-376 (2015).

82. Wang Y, *et al.* Cardiac glycosides induce autophagy in human non-small cell lung cancer cells through regulation of dual signaling pathways. *Int J Biochem Cell Biol* **44**, 1813-1824 (2012).
83. Dunn DE, He DN, Yang P, Johansen M, Newman RA, Lo DC. In vitro and in vivo neuroprotective activity of the cardiac glycoside oleandrin from Nerium oleander in brain slice-based stroke models. *J Neurochem* **119**, 805-814 (2011).
84. Wang JKT, *et al.* Cardiac glycosides provide neuroprotection against ischemic stroke: discovery by a brain slice-based compound screening platform. *Proceedings of the National Academy of Sciences of the United States of America* **103**, 10461-10466 (2006).
85. Elmaci İ, Alturfan EE, Cengiz S, Ozpinar A, Altinoz MA. Neuroprotective and tumoricidal activities of cardiac glycosides. Could oleandrin be a new weapon against stroke and glioblastoma? *Int J Neurosci* **128**, 865-877 (2018).
86. Rossignoli G, *et al.* Aromatic l-amino acid decarboxylase deficiency: a patient-derived neuronal model for precision therapies. *Brain* **144**, 2443-2456 (2021).
87. Kirkeby A, Nelander J, Parmar M. Generating regionalized neuronal cells from pluripotency, a step-by-step protocol. *Frontiers in cellular neuroscience* **6**, 64 (2012).
88. Huang da W, Sherman BT, Lempicki RA. Systematic and integrative analysis of large gene lists using DAVID bioinformatics resources. *Nature protocols* **4**, 44-57 (2009).
89. Mi H, *et al.* PANTHER version 16: a revised family classification, tree-based classification tool, enhancer regions and extensive API. *Nucleic acids research* **49**, D394-d403 (2021).
90. Bindea G, *et al.* ClueGO: a Cytoscape plug-in to decipher functionally grouped gene ontology and pathway annotation networks. *Bioinformatics* **25**, 1091-1093 (2009).

| Hit | Source plate | Well | Z score | Compound                   |
|-----|--------------|------|---------|----------------------------|
| 1   | 14           | A10  | 253.64  | Oxyphenbutazone            |
| 2   | 6            | D09  | 152.67  | Doxorubicin hydrochloride  |
| 3   | 14           | C09  | 107.82  | Thiethylperazine dimalate  |
| 4   | 10           | F08  | 93.28   | Alexidine dihydrochloride  |
| 5   | 7            | A08  | 82.75   | Daunorubicin hydrochloride |
| 6   | 9            | D07  | 60.76   | Beta-Escin                 |
| 7   | 15           | F02  | 57      | Topotecan                  |
| 8   | 9            | B07  | 53.24   | Lanatoside C               |
| 9   | 12           | A04  | 46.93   | Digoxigenin                |
| 10  | 12           | E06  | 39.85   | Thonzonium bromide         |
| 11  | 11           | B02  | 32.34   | Auranofin                  |
| 12  | 8            | H11  | 25.03   | Sertindole                 |

|    |    |     |       |                                    |
|----|----|-----|-------|------------------------------------|
| 13 | 16 | G02 | 24.93 | Epirubicin hydrochloride           |
| 14 | 16 | B05 | 24.49 | Tegaserod maleate                  |
| 15 | 9  | G09 | 24.39 | Benzethonium chloride              |
| 16 | 6  | D08 | 21.69 | Digoxin                            |
| 17 | 5  | G06 | 21.09 | Mitoxantrone dihydrochloride       |
| 18 | 9  | G06 | 19.4  | Methyl benzethonium chloride       |
| 19 | 7  | G11 | 18.22 | Parthenolide                       |
| 20 | 6  | D07 | 17.8  | Digitoxigenin                      |
| 21 | 5  | H08 | 15.89 | Clomiphene citrate (Z,E)           |
| 22 | 9  | A11 | 14.96 | Pinaverium bromide                 |
| 23 | 4  | E07 | 14.67 | Perhexiline maleate                |
| 24 | 13 | C07 | 14.2  | Proscillaridin A                   |
| 25 | 1  | H09 | 13.55 | Thioridazine hydrochloride         |
| 26 | 6  | A10 | 13.41 | Amiodarone hydrochloride           |
| 27 | 2  | F07 | 12.87 | Astemizole                         |
| 28 | 7  | E03 | 11.92 | Thiostrepton                       |
| 29 | 13 | H11 | 11.5  | Pyrvinium pamoate                  |
| 30 | 4  | H09 | 10.16 | Quinacrine dihydrochloride hydrate |
| 31 | 5  | F06 | 10.13 | Methiothepin maleate               |
| 32 | 10 | G08 | 9.97  | Merbromin                          |
| 33 | 9  | A07 | 9.16  | Oxiconazole Nitrate                |
| 34 | 2  | E07 | 9.1   | Mefloquine hydrochloride           |
| 35 | 2  | G07 | 8.59  | Tamoxifen citrate                  |
| 36 | 5  | E09 | 8.14  | Bepidil hydrochloride              |
| 37 | 14 | A06 | 7.55  | Sertaconazole nitrate              |
| 38 | 7  | H11 | 7.49  | Prenylamine lactate                |
| 39 | 13 | A11 | 7.18  | Indatraline hydrochloride          |
| 40 | 5  | G07 | 6.77  | GBR 12909 dihydrochloride          |
| 41 | 16 | E05 | 6.53  | Benzoxiquine                       |
| 42 | 2  | G04 | 6.11  | Chlorhexidine                      |
| 43 | 4  | H04 | 6.06  | Trifluoperazine dihydrochloride    |
| 44 | 6  | F08 | 5.67  | Meclozine dihydrochloride          |
| 45 | 3  | D11 | 5.59  | Camptothecin (S,+)                 |
| 46 | 4  | C11 | 5.49  | Fendiline hydrochloride            |
| 47 | 11 | A11 | 5.47  | Sulconazole nitrate                |
| 48 | 10 | C08 | 5.44  | Aprepitant                         |
| 49 | 14 | C11 | 5.42  | Vorinostat                         |
| 50 | 9  | B11 | 5.37  | Avermectin B1a                     |
| 51 | 5  | E05 | 4.47  | Metergoline                        |
| 52 | 13 | H02 | 4.27  | Halofantrine hydrochloride         |
| 53 | 9  | C07 | 4.17  | Nisoldipine                        |
| 54 | 4  | H11 | 4.16  | Fluphenazine dihydrochloride       |
| 55 | 1  | H12 | 4     | Positive Control                   |
| 56 | 15 | H11 | 3.94  | Hexachlorophene                    |
| 57 | 5  | C09 | 3.91  | Chlorprothixene hydrochloride      |
| 58 | 10 | G12 | 3.51  | Positive Control                   |
| 59 | 7  | G02 | 3.43  | Ciclopirox ethanolamine            |
| 60 | 4  | G05 | 3.43  | Econazole nitrate                  |
| 61 | 12 | A12 | 3.27  | Positive Control                   |
| 62 | 1  | H07 | 3.13  | Dibucaine                          |
| 63 | 2  | H12 | 3.12  | Positive Control                   |
| 64 | 4  | H03 | 3.02  | Flunarizine dihydrochloride        |
| 65 | 11 | G12 | 2.91  | Positive Control                   |
| 66 | 1  | A12 | 2.85  | Positive Control                   |
| 67 | 11 | G07 | 2.84  | Azacytidine-5                      |

|     |    |     |      |                               |
|-----|----|-----|------|-------------------------------|
| 68  | 3  | A02 | 2.84 | Isoniazid                     |
| 69  | 2  | E05 | 2.83 | Tioconazole                   |
| 70  | 13 | F05 | 2.79 | Sertraline                    |
| 71  | 2  | G12 | 2.7  | Positive Control              |
| 72  | 1  | F12 | 2.69 | Positive Control              |
| 73  | 11 | F12 | 2.68 | Positive Control              |
| 74  | 1  | A02 | 2.66 | Azaguanine-8                  |
| 75  | 1  | D12 | 2.6  | Positive Control              |
| 76  | 10 | F12 | 2.59 | Positive Control              |
| 77  | 10 | H12 | 2.56 | Positive Control              |
| 78  | 6  | B05 | 2.56 | Amlodipine                    |
| 79  | 16 | G05 | 2.55 | Lomerizine hydrochloride      |
| 80  | 11 | G03 | 2.55 | Raloxifene hydrochloride      |
| 81  | 5  | H10 | 2.52 | Prochlorperazine dimaleate    |
| 82  | 5  | G04 | 2.5  | Nicardipine hydrochloride     |
| 83  | 5  | H07 | 2.5  | Etoposide                     |
| 84  | 2  | D12 | 2.49 | Positive Control              |
| 85  | 14 | H12 | 2.48 | Positive Control              |
| 86  | 13 | F12 | 2.47 | Positive Control              |
| 87  | 6  | A11 | 2.46 | Amphotericin B                |
| 88  | 1  | C12 | 2.45 | Positive Control              |
| 89  | 16 | H11 | 2.44 | Cefprozil                     |
| 90  | 11 | A12 | 2.43 | Positive Control              |
| 91  | 16 | H10 | 2.3  | Desonide                      |
| 92  | 14 | H06 | 2.29 | Ronidazole                    |
| 93  | 1  | G12 | 2.27 | Positive Control              |
| 94  | 4  | H10 | 2.26 | Clofilium tosylate            |
| 95  | 1  | F08 | 2.25 | Benoxinate hydrochloride      |
| 96  | 11 | G06 | 2.24 | Simvastatin                   |
| 97  | 5  | F12 | 2.2  | Positive Control              |
| 98  | 10 | B11 | 2.19 | Ebselen                       |
| 99  | 10 | E12 | 2.16 | Positive Control              |
| 100 | 3  | B02 | 2.14 | Tranexamic acid               |
| 101 | 12 | A03 | 2.13 | Bemegride                     |
| 102 | 16 | H12 | 2.13 | Positive Control              |
| 103 | 11 | H12 | 2.11 | Positive Control              |
| 104 | 16 | G12 | 2.1  | Positive Control              |
| 105 | 12 | A08 | 2.09 | Oxybenzone                    |
| 106 | 7  | H05 | 2.08 | Tolazamide                    |
| 107 | 1  | B12 | 2.07 | Positive Control              |
| 108 | 4  | F12 | 2.06 | Positive Control              |
| 109 | 7  | D01 | 2.04 | Positive Control              |
| 110 | 10 | A10 | 2.02 | Sulfanilamide                 |
| 111 | 12 | A09 | 2    | Promethazine hydrochloride    |
| 112 | 5  | C12 | 1.99 | Positive Control              |
| 113 | 12 | B03 | 1.98 | Flubendazol                   |
| 114 | 2  | C12 | 1.97 | Positive Control              |
| 115 | 10 | B12 | 1.87 | Positive Control              |
| 116 | 8  | H07 | 1.86 | Penciclovir                   |
| 117 | 11 | B12 | 1.86 | Positive Control              |
| 118 | 7  | H04 | 1.86 | Pentamidine isethionate       |
| 119 | 12 | A01 | 1.83 | Positive Control              |
| 120 | 6  | B10 | 1.82 | Bisacodyl                     |
| 121 | 1  | F04 | 1.8  | Triflupromazine hydrochloride |
| 122 | 5  | C08 | 1.79 | Thioguanosine                 |

|     |    |     |      |                                |
|-----|----|-----|------|--------------------------------|
| 123 | 15 | H12 | 1.77 | Positive Control               |
| 124 | 9  | A03 | 1.76 | Gefitinib                      |
| 125 | 16 | H08 | 1.75 | Triclabendazole                |
| 126 | 8  | H12 | 1.74 | Positive Control               |
| 127 | 7  | A05 | 1.73 | Benperidol                     |
| 128 | 13 | D12 | 1.71 | Positive Control               |
| 129 | 2  | E12 | 1.71 | Positive Control               |
| 130 | 4  | H12 | 1.71 | Positive Control               |
| 131 | 14 | E03 | 1.69 | (-)-Eseroline fumarate salt    |
| 132 | 13 | D09 | 1.69 | Zuclopenthixol dihydrochloride |
| 133 | 12 | A07 | 1.69 | Cloquinol                      |
| 134 | 16 | F11 | 1.67 | Ritonavir                      |
| 135 | 16 | E01 | 1.67 | Positive Control               |
| 136 | 14 | F12 | 1.66 | Positive Control               |
| 137 | 1  | H08 | 1.66 | Prednisone                     |
| 138 | 15 | H09 | 1.65 | Sildenafil                     |
| 139 | 16 | H04 | 1.64 | Raltitrexed                    |
| 140 | 16 | H03 | 1.62 | Pemetrexed disodium            |
| 141 | 7  | H03 | 1.6  | Selegiline hydrochloride       |
| 142 | 3  | B01 | 1.59 | Positive Control               |
| 143 | 12 | D12 | 1.59 | Positive Control               |
| 144 | 11 | A10 | 1.59 | Dichlorphenamide               |
| 145 | 16 | D02 | 1.58 | Aminacrine                     |
| 146 | 9  | H07 | 1.57 | Pramoxine hydrochloride        |
| 147 | 2  | B11 | 1.57 | Nocodazole                     |
| 148 | 11 | D12 | 1.57 | Positive Control               |
| 149 | 7  | C12 | 1.57 | Positive Control               |
| 150 | 4  | G12 | 1.55 | Positive Control               |
| 151 | 6  | H07 | 1.54 | Primaquine diphosphate         |
| 152 | 12 | A10 | 1.54 | Diacerein                      |
| 153 | 1  | C07 | 1.53 | Cimetidine                     |
| 154 | 6  | H06 | 1.53 | Brompheniramine maleate        |
| 155 | 10 | A09 | 1.51 | Sulfadimethoxine               |
| 156 | 1  | G10 | 1.51 | Acebutolol hydrochloride       |
| 157 | 1  | F11 | 1.5  | Tolazoline hydrochloride       |
| 158 | 11 | H06 | 1.5  | Reserpine                      |
| 159 | 10 | H09 | 1.49 | Dienestrol                     |
| 160 | 13 | E12 | 1.48 | Positive Control               |
| 161 | 16 | H07 | 1.48 | Milnacipran hydrochloride      |
| 162 | 11 | E12 | 1.47 | Positive Control               |
| 163 | 10 | H10 | 1.47 | Pridinol methanesulfonate salt |
| 164 | 16 | H05 | 1.47 | Ceftibuten                     |
| 165 | 6  | H09 | 1.46 | Felodipine                     |
| 166 | 10 | A04 | 1.46 | Phenethicillin potassium salt  |
| 167 | 10 | H11 | 1.45 | Amrinone                       |
| 168 | 7  | D12 | 1.45 | Positive Control               |
| 169 | 8  | H05 | 1.43 | Tomoxetine hydrochloride       |
| 170 | 10 | G10 | 1.43 | Drofenine hydrochloride        |
| 171 | 13 | H06 | 1.42 | Molindone hydrochloride        |
| 172 | 10 | G03 | 1.42 | Podophyllotoxin                |
| 173 | 16 | D12 | 1.42 | Positive Control               |
| 174 | 10 | D12 | 1.42 | Positive Control               |
| 175 | 2  | H11 | 1.41 | Gentamicine sulfate            |
| 176 | 12 | C12 | 1.41 | Positive Control               |
| 177 | 15 | H08 | 1.4  | Rivastigmine                   |

|     |    |     |      |                                 |
|-----|----|-----|------|---------------------------------|
| 178 | 8  | H10 | 1.4  | Etoricoxib                      |
| 179 | 11 | A09 | 1.39 | Furazolidone                    |
| 180 | 1  | G08 | 1.39 | Miconazole                      |
| 181 | 5  | D12 | 1.39 | Positive Control                |
| 182 | 15 | G12 | 1.38 | Positive Control                |
| 183 | 1  | H11 | 1.37 | Trimethobenzamide hydrochloride |
| 184 | 8  | H09 | 1.37 | Dexfenfluramine hydrochloride   |
| 185 | 6  | A05 | 1.36 | Idebenone                       |
| 186 | 1  | H06 | 1.35 | Adiphenine hydrochloride        |
| 187 | 6  | B01 | 1.34 | Positive Control                |
| 188 | 16 | E12 | 1.33 | Positive Control                |
| 189 | 13 | C12 | 1.33 | Positive Control                |
| 190 | 1  | E12 | 1.33 | Positive Control                |
| 191 | 5  | F07 | 1.33 | Clofazimine                     |
| 192 | 10 | C09 | 1.32 | Monensin sodium salt            |
| 193 | 13 | H07 | 1.32 | Alcuronium chloride             |
| 194 | 13 | G04 | 1.32 | Isometheptene mucate            |
| 195 | 8  | H04 | 1.3  | Thiorphan                       |
| 196 | 13 | C10 | 1.3  | Chlormadinone acetate           |
| 197 | 3  | A03 | 1.3  | Pentylentetrazole               |
| 198 | 1  | F09 | 1.28 | Oxethazaine                     |
| 199 | 14 | H09 | 1.26 | Cefepime hydrochloride          |
| 200 | 11 | A07 | 1.25 | Trimipramine maleate salt       |

**Supplementary Table 10. ATG differential gene expression in Day 65 mDA Patient 02 cultures after CRISPR correction and compound treatments.**

| ATG       | Patient 02 vs (Controls 01 and 02) |             | CRISPR 01 vs Patient 02 |            | Digoxin-treated line vs Patient 02 |            | Torin 1-treated vs Patient 02 |            |
|-----------|------------------------------------|-------------|-------------------------|------------|------------------------------------|------------|-------------------------------|------------|
|           | FC                                 | P-Value     | FC                      | P-Value    | FC                                 | P-Value    | FC                            | P-Value    |
| AMBRA1    | 0.43706262 (down)                  | 6.14E-04    | 0.7145338 (down)        | 0.16574542 | 1.2240671 (up)                     | 0.487703   | 0.8595378 (down)              | 0.7000872  |
| ATG12     | 1.0688772 (no change)              | 0.792146    | 1.1249504 (up)          | 0.10514027 | 0.92068404 (down)                  | 0.61909074 | 1.168334 (up)                 | 0.33339965 |
| ATG13     | 0.9291793 (down)                   | 0.7693057   | 0.93510157 (down)       | 0.5057616  | 0.4419558 (down)                   | 0.0680989  | 0.90944344 (down)             | 0.42617658 |
| ATG14     | 1.1413882 (up)                     | 0.5587088   | Not mapped              | Not mapped | 0.6088769 (down)                   | 0.17958279 | Not mapped                    | Not mapped |
| ATG16L1   | 0.59600216 (down)                  | 0.31001356  | 1.0367168 (no change)   | 0.9407053  | 2.9104712 (up)                     | 0.00144182 | 1.3612424 (up)                | 0.54965794 |
| ATG16L2   | 0.71721536 (down)                  | 0.010059934 | Not mapped              | Not mapped | Not mapped                         | Not mapped | 1.1957258 (up)                | 0.6599298  |
| ATG2A     | 0.9201323 (down)                   | 0.8116482   | 1.986146 (up)           | 0.16611445 | 1.2601732 (up)                     | 0.6257956  | 1.1654925 (up)                | 0.7045777  |
| ATG2B     | 0.81731015 (down)                  | 0.24680214  | 1.335941 (up)           | 0.35303855 | 2.0343752 (up)                     | 0.04702732 | 1.1501077 (up)                | 0.5015331  |
| ATG3      | 0.84620136 (down)                  | 0.44752243  | Not mapped              | Not mapped | 1.0925838 (no change)              | 0.8455659  | 0.81203955 (down)             | 0.6288875  |
| ATG4B     | 1.6198123 (up)                     | 0.5479161   | 0.7977216 (down)        | 0.29556963 | 0.5249194 (down)                   | 0.4338038  | 0.3615233 (down)              | 0.00814244 |
| ATG5      | 2.085391 (up)                      | 0.01342523  | Not mapped              | Not mapped | 0.5981643 (down)                   | 0.27420387 | 0.73430216 (down)             | 0.37415075 |
| BECN1     | 4.088446 (up)                      | 0.19371912  | 0.43691146 (down)       | 0.5124709  | 0.09202237 (down)                  | 0.21182562 | 0.15318666 (down)             | 0.28554642 |
| EPG5      | 0.891338 (down)                    | 0.8618909   | 1.0892509 (no change)   | 0.6674719  | 2.3882854 (up)                     | 0.17077148 | 1.0209918 (no change)         | 0.8568484  |
| GABARAP   | 1.0952392 (no change)              | 0.78651476  | 0.89669627 (down)       | 0.6855389  | 0.60620856 (down)                  | 0.08376524 | 1.1691217 (up)                | 0.5665487  |
| GABARAPL1 | 0.8820572 (down)                   | 0.5491498   | 1.0306478 (no change)   | 0.85970575 | 1.750449 (up)                      | 0.12943085 | 1.3634212 (up)                | 0.24656725 |
| GABARAPL2 | 0.9287938 (down)                   | 0.82963806  | 0.8410031 (down)        | 0.62539303 | 0.75546306 (down)                  | 0.20855312 | 1.3366152 (up)                | 0.37566233 |
| MAP1LC3A  | 0.8614579 (down)                   | 0.6068979   | 1.5705838 (up)          | 0.20977472 | 1.4284861 (up)                     | 0.01311642 | 1.3044173 (up)                | 0.02771006 |
| MAP1LC3B  | 0.9986874 (down)                   | 0.99608976  | 0.7477211 (down)        | 0.19170646 | 1.5358086 (up)                     | 0.48995838 | 0.87073094 (down)             | 0.72981685 |
| RAB24     | 1.0563483 (no change)              | 0.7662744   | Not mapped              | Not mapped | Not mapped                         | Not mapped | Not mapped                    | Not mapped |
| RAB7A     | 0.91218925 (down)                  | 0.57352966  | 0.97811717 (down)       | 0.91971004 | 1.3447509 (up)                     | 0.07130751 | 1.143196 (up)                 | 0.4439764  |
| ULK1      | 0.6885398 (down)                   | 0.32386762  | 2.6435022 (up)          | 0.00500735 | 0.46201056 (down)                  | 0.03606971 | 2.4438975 (up)                | 0.00704683 |
| ULK2      | 1.6028628 (up)                     | 0.43187773  | 1.4053199 (up)          | 0.04052436 | 0.5006925 (down)                   | 0.01474166 | 1.067213 (no change)          | 0.8066371  |
| UVRAG     | 0.16716082 (down)                  | 1.77E-05    | 2.3673134 (up)          | 0.05409699 | 3.923307 (up)                      | 0.00618942 | 2.1328526 (up)                | 0.03366591 |
| WIPI1     | 1.1785417 (up)                     | 0.62346715  | 0.43872187 (down)       | 0.01289181 | 0.5140383 (down)                   | 0.01987111 | 1.1200486 (up)                | 0.5993699  |
| WIPI2     | 0.71252674 (down)                  | 0.025780724 | 0.6941722 (down)        | 0.19979995 | Not mapped                         | Not mapped | 1.2907548 (up)                | 0.11014623 |
| WIPI3     | 0.8958507 (down)                   | 0.6354098   | 1.0138819 (no change)   | 0.96299773 | 0.80224526 (down)                  | 0.4812425  | 0.9755141 (down)              | 0.93992513 |
| WDR45     | 2.1794524 (up)                     | 0.051202912 | Not mapped              | Not mapped | Not mapped                         | Not mapped | Not mapped                    | Not mapped |



Genes marked in blue show consistent under- or over-expression when comparing the Patient 02 untreated mDA line profiles with the corresponding CRISPR-corrected and compound-treated ones. Many known ATGs were interrogated. *P*-value and fold change cut-offs were not applied for this analysis; however, some genes have significant *p*- and fold change values in different conditions. ATG= autophagy-related gene, FC= fold change.

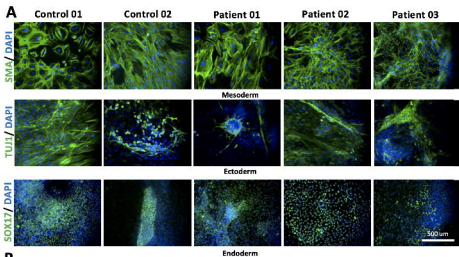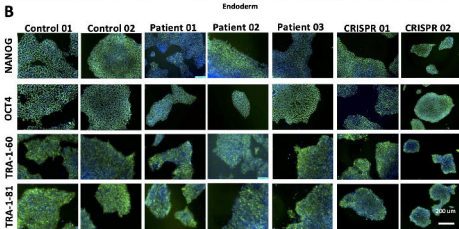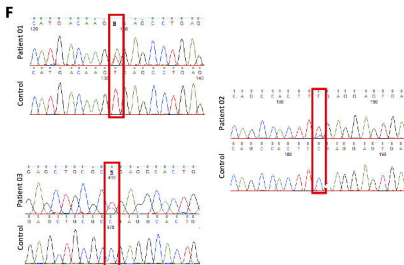

**H**

**WT\_MDR45**  
c.193C>T\_MDR45  
CRISPR\_corrected\_MDR45

```

ATGCTCAACAGCCACTTCTGGAGTTCACAGCTGGTTCACACAGACCAAGGCTC 69
ATGCTCAACAGCCACTTCTGGAGTTCACAGCTGGTTCACACAGACCAAGGCTC 69
ATGCTCAACAGCCACTTCTGGAGTTCACAGCTGGTTCACACAGACCAAGGCTC 69

```

**WT\_MDR45**  
c.193C>T\_MDR45  
CRISPR\_corrected\_MDR45

```

TTTTTCTGCGCATGAGACAGAGCTCTGCACTCAACCTGGAGCCTTGTATGGAAAG 129
TTTTTCTGCGCATGAGACAGAGCTCTGCACTCAACCTGGAGCCTTGTATGGAAAG 129
TTTTTCTGCGCATGAGACAGAGCTCTGCACTCAACCTGGAGCCTTGTATGGAAAG 129

```

**WT\_MDR45**  
c.193C>T\_MDR45  
CRISPR\_corrected\_MDR45

```

TTGAGTCTGAGTCTGAGTCTGAGTCTGAGTCTGAGTCTGAGTCTGAGTCTGAGT 449
TTGAGTCTGAGTCTGAGTCTGAGTCTGAGTCTGAGTCTGAGTCTGAGTCTGAGT 449
TTGAGTCTGAGTCTGAGTCTGAGTCTGAGTCTGAGTCTGAGTCTGAGTCTGAGT 449

```

**WT\_MDR45**  
c.700C>T\_MDR45  
CRISPR\_corrected\_MDR45

```

NLLACAGGAGGATCTGGAGTCTGAGTCTGAGTCTGAGTCTGAGTCTGAGTCTGAGT 129
NLLACAGGAGGATCTGGAGTCTGAGTCTGAGTCTGAGTCTGAGTCTGAGTCTGAGT 129
NLLACAGGAGGATCTGGAGTCTGAGTCTGAGTCTGAGTCTGAGTCTGAGTCTGAGT 129

```

**WT\_MDR45**  
c.700C>T\_MDR45  
CRISPR\_corrected\_MDR45

```

GAGTCTGAGTCTGAGTCTGAGTCTGAGTCTGAGTCTGAGTCTGAGTCTGAGTCTGAGT 199
GAGTCTGAGTCTGAGTCTGAGTCTGAGTCTGAGTCTGAGTCTGAGTCTGAGTCTGAGT 199
GAGTCTGAGTCTGAGTCTGAGTCTGAGTCTGAGTCTGAGTCTGAGTCTGAGTCTGAGT 199

```

**WT\_MDR45**  
c.700C>T\_MDR45  
CRISPR\_corrected\_MDR45

```

GTTGAGTCTGAGTCTGAGTCTGAGTCTGAGTCTGAGTCTGAGTCTGAGTCTGAGT 309
GTTGAGTCTGAGTCTGAGTCTGAGTCTGAGTCTGAGTCTGAGTCTGAGTCTGAGT 309
GTTGAGTCTGAGTCTGAGTCTGAGTCTGAGTCTGAGTCTGAGTCTGAGTCTGAGT 309

```

**WT\_MDR45**  
c.700C>T\_MDR45  
CRISPR\_corrected\_MDR45

```

TTGAGTCTGAGTCTGAGTCTGAGTCTGAGTCTGAGTCTGAGTCTGAGTCTGAGT 449
TTGAGTCTGAGTCTGAGTCTGAGTCTGAGTCTGAGTCTGAGTCTGAGTCTGAGT 449
TTGAGTCTGAGTCTGAGTCTGAGTCTGAGTCTGAGTCTGAGTCTGAGTCTGAGT 449

```

**Patient 02; c.193C>T, and CRISPR 01**

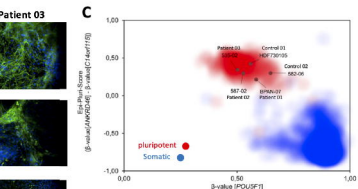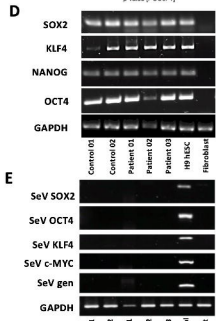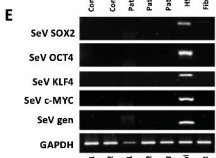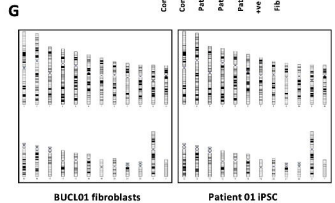

**Patient 03; c.700C>T, and CRISPR 03**

**WT\_MDR45**  
c.700C>T\_MDR45  
CRISPR\_corrected\_MDR45

```

TTGAGTCTGAGTCTGAGTCTGAGTCTGAGTCTGAGTCTGAGTCTGAGTCTGAGT 69
TTGAGTCTGAGTCTGAGTCTGAGTCTGAGTCTGAGTCTGAGTCTGAGTCTGAGT 69
TTGAGTCTGAGTCTGAGTCTGAGTCTGAGTCTGAGTCTGAGTCTGAGTCTGAGT 69

```

**WT\_MDR45**  
c.700C>T\_MDR45  
CRISPR\_corrected\_MDR45

```

TTTTTCTGCGCATGAGACAGAGCTCTGCACTCAACCTGGAGCCTTGTATGGAAAG 129
TTTTTCTGCGCATGAGACAGAGCTCTGCACTCAACCTGGAGCCTTGTATGGAAAG 129
TTTTTCTGCGCATGAGACAGAGCTCTGCACTCAACCTGGAGCCTTGTATGGAAAG 129

```

**WT\_MDR45**  
c.700C>T\_MDR45  
CRISPR\_corrected\_MDR45

```

TTGAGTCTGAGTCTGAGTCTGAGTCTGAGTCTGAGTCTGAGTCTGAGTCTGAGT 449
TTGAGTCTGAGTCTGAGTCTGAGTCTGAGTCTGAGTCTGAGTCTGAGTCTGAGT 449
TTGAGTCTGAGTCTGAGTCTGAGTCTGAGTCTGAGTCTGAGTCTGAGTCTGAGT 449

```

| Term          | Pathways                                 | Count | Pvalue      | Genes                                                        |
|---------------|------------------------------------------|-------|-------------|--------------------------------------------------------------|
| GO:0005745    | cellular catabolic process               | 8     | 4.13E-11    | COL1A1, COL3A1, COL3A2, COL1A2, COL5A1, COL4A1, MMP2, COL5A2 |
| GO:0030198    | extracellular matrix organization        | 8     | 1.09E-07    | COL1A1, COL3A1, COL3A2, COL1A2, COL5A1, COL4A1, ICAM5        |
| GO:0071230    | cellular response to amino acid stimulus | 6     | 3.61E-08    | COL1A1, COL3A1, COL1A2, COL4A1, MMP2, COL5A2                 |
| GO:0030199    | collagen fibril organization             | 5     | 1.10E-06    | COL1A1, COL3A1, COL1A2, COL5A1, COL5A2                       |
| GO:0071555    | cell adhesion                            | 5     | 0.01360993  | PTPRF, COL1A5, COL18A1, COL5A1, ICAM5                        |
| GO:0050776    | regulation of immune response            | 4     | 0.00505038  | COL1A1, COL3A1, COL1A2, ICAM5                                |
| GO:0030132    | angiogenesis                             | 4     | 0.01021186  | COL1A1, EFNA1, MMP2, F2RL3                                   |
| GO:0030168    | platelet activation                      | 3     | 0.02615229  | COL1A1, COL3A1, COL1A2                                       |
| GO:0071516    | hemophilic cell adhesion                 | 3     | 0.04055002  | PTPRF, PCDHGA10, CDH82                                       |
| GO:1903225    | endometrial cell differentiation         | 2     | 0.00404568  | COL1A1, COL5A2                                               |
| GO:0030172    | osteification                            | 2     | 0.01208019  | COL1A1, MMP2                                                 |
| GO:0012964    | collagen biosynthetic process            | 2     | 0.01208019  | COL1A1, COL5A1                                               |
| GO:0060346    | bone trabeculae formation                | 2     | 0.01807191  | COL1A1, MMP2                                                 |
| GO:0043489    | skin morphogenesis                       | 2     | 0.01808041  | COL1A1, COL5A2                                               |
| GO:0042026    | extracellular fibril organization        | 2     | 0.02406408  | COL3A1, COL1A2, COL5A1                                       |
| GO:0072028    | protein heterodimerization               | 2     | 0.02788456  | COL1A1, COL1A2                                               |
| KEGG:hsa04874 | Protein digestion and absorption         | 7     | 4.08E-08    | COL1A1, COL3A1, COL1A2, COL5A1, COL4A1, COL5A2               |
| KEGG:hsa04512 | ECM-receptor interaction                 | 6     | 3.58E-06    | COL1A1, COL3A1, COL1A2, COL5A1, COL4A1, COL5A2               |
| KEGG:hsa04510 | Focal adhesion                           | 6     | 3.06E-04    | COL1A1, COL3A1, COL1A2, COL5A1, COL4A1, COL5A2               |
| KEGG:hsa04151 | PI3K-Akt signaling pathway               | 6     | 0.005116253 | COL1A1, COL3A1, COL1A2, COL5A1, COL4A1, COL5A2               |
| KEGG:hsa04811 | Platelet activation                      | 5     | 2.39E-04    | COL5A2                                                       |
| KEGG:hsa04216 | Ferrihorrhea                             | 2     | 0.02318298  | ACSL6, SLC6A1                                                |
| KEGG:hsa04712 | Neurotrophin signaling pathway           | 2     | 0.02483856  | ARHGAP16, MAPK7                                              |
| KEGG:hsa04618 | atherosclerosis                          | 2     | 0.03876009  | MAPK7, MMP2                                                  |

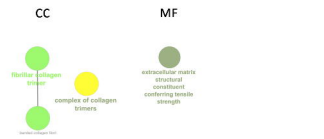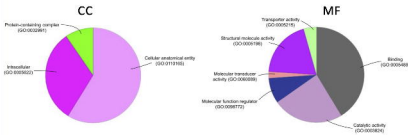

GO enriched terms in Patients vs (Controls & CRISPR)

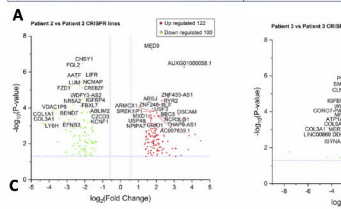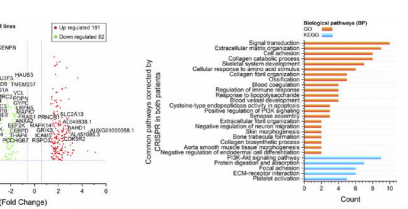

| Term          | Pathways                                                | Count | Pvalue      | Genes                                                                                                |
|---------------|---------------------------------------------------------|-------|-------------|------------------------------------------------------------------------------------------------------|
| GO:0007165    | Signal transduction                                     | 10    | 0.007448097 | PTPRF, EXT1, THBD, MAPK7, CRABP2, IGFBP4, ARAF2, EMT1, GSK3B, JAK2, TXK2                             |
| GO:0030198    | Extracellular matrix organization                       | 9     | 3.36E-06    | COL1A1, COL3A1, COL1A2, COL5A1, COL4A1, COL1A1, COL3A1, COL1A2, COL5A1, COL4A1, COL1A1, MMP2, COL5A2 |
| GO:0030574    | Collagen catabolic process                              | 8     | 7.47E-09    | MMP2, COL5A2                                                                                         |
| GO:0007155    | Cell adhesion                                           | 8     | 0.002772355 | AATF                                                                                                 |
| GO:0001001    | Cellular response to amino acid stimulus                | 7     | 2.08E-05    | EXT1, COL1A1, COL3A1, COL5A2, IGFBP4, CDH31, COL5A2                                                  |
| GO:0071230    | collagen fibril organization                            | 6     | 3.30E-06    | COL1A1, COL3A1, COL1A2, COL4A1, MMP2, COL5A2                                                         |
| GO:0001001    | Cellular response to amino acid stimulus                | 5     | 0.024496387 | COL1A1, MMP2, EXT1, CDH31, COL5A2                                                                    |
| GO:0030198    | Extracellular matrix organization                       | 5     | 1.93E-05    | COL1A1, COL3A1, COL1A2, COL5A1, COL5A2                                                               |
| GO:0001001    | Cellular response to amino acid stimulus                | 4     | 5.95E-04    | COL1A1, COL3A1, COL5A1, AHR                                                                          |
| GO:0032496    | Response to lipopolysaccharide                          | 4     | 0.028975494 | THBD, NFKB1, JAK2, DCN                                                                               |
| GO:0050776    | Regulation of immune response                           | 4     | 0.04868949  | COL1A1, COL3A1, COL1A2, ICAM5                                                                        |
| GO:0007596    | Blood coagulation                                       | 4     | 0.040052815 | COL1A1, THBD, COL1A2, JAK2                                                                           |
| GO:0007410    | Synapse assembly                                        | 3     | 0.020568214 | RIBB1B1, DISCAM, NR61                                                                                |
| GO:0014068    | Positive regulation of PI3K signaling                   | 3     | 0.023102436 | NR61, JAK2, DCN                                                                                      |
| GO:0008919    | Cysteine-type endopeptidase activity in zymogens        | 3     | 0.049755118 | NFKB1, JAK2, BIRC3                                                                                   |
| GO:0001001    | Negative regulation of endometrial cell differentiation | 2     | 0.008201558 | COL1A1, COL5A2                                                                                       |
| GO:1903225    | Osteification                                           | 2     | 0.004406387 | COL1A1, COL5A2                                                                                       |
| GO:0060346    | Bone trabeculae formation                               | 2     | 0.022772442 | COL3A1, PROK1                                                                                        |
| GO:0032964    | Collagen biosynthetic process                           | 2     | 0.024406387 | COL1A1, COL5A1                                                                                       |
| GO:0060346    | Bone trabeculae formation                               | 2     | 0.024204549 | COL1A1, MMP2                                                                                         |
| GO:0043489    | Skin morphogenesis                                      | 2     | 0.038388366 | COL1A1, COL5A2                                                                                       |
| GO:0002223    | Migration                                               | 2     | 0.008388366 | COL3A1, NR61                                                                                         |
| GO:0060326    | Extracellular fibril organization                       | 2     | 0.046725371 | COL3A1, COL5A2                                                                                       |
| KEGG          |                                                         |       |             |                                                                                                      |
| KEGG:hsa04151 | PI3K-Akt signaling pathway                              | 9     | 6.36E-05    | COL1A1, NFKB1, JAK2, COL1A2, DITPA, JAK2                                                             |
| KEGG:hsa04874 | Protein digestion and absorption                        | 7     | 3.38E-06    | COL1A1, COL18A1, COL1A1, COL1A2, COL5A1, COL4A1, COL5A2                                              |
| KEGG:hsa04512 | ECM-receptor interaction                                | 6     | 1.49E-05    | COL1A1, COL3A1, COL1A2, COL5A1, COL4A1, COL5A2                                                       |
| KEGG:hsa04510 | Focal adhesion                                          | 6     | 0.005153248 | COL1A1, COL3A1, COL1A2, COL5A1, COL4A1, COL5A2                                                       |
| KEGG:hsa04618 | atherosclerosis                                         | 5     | 0.003095127 | COL1A1, COL3A1, COL1A2, COL5A1, COL5A2                                                               |

| Term          | Pathways                                 | Count | Pvalue      | Genes                                                                                                                                                               |
|---------------|------------------------------------------|-------|-------------|---------------------------------------------------------------------------------------------------------------------------------------------------------------------|
| GO:0030198    | extracellular matrix organization        | 21    | 1.85E-14    | COL1A1, LUM, FN1, HSD17B12, LAMC1, THBS1, FN1, COL1A1, COL1A1, VCAN, COL1A2, COL5A1, LOX, COL4A1, COL5A2, ITGA5, TGFBI, COL2A1, COL4A1, JAM3, FN1                   |
| GO:0043036    | negative regulation of apoptotic process | 11    | 0.021860737 | PDGFRB, ANXA1, PLF2, POEA3, TAF1A1, VEGFR, SPRT2, TAF12, THBS1, GNAI1, MCL1                                                                                         |
| GO:0003199    | collagen fibril organization             | 9     | 5.79E-05    | LUM, COL1A1, COL5A2                                                                                                                                                 |
| GO:0001001    | angiogenesis                             | 9     | 0.002464834 | TGFBI, JAM3                                                                                                                                                         |
| GO:0001649    | osteoblast differentiation               | 8     | 1.11E-04    | COL1A1, WWI1R1, VCAN, GIAL, DHX9, CDC47, PINK, RBM8                                                                                                                 |
| GO:0005074    | collagen catabolic process               | 7     | 5.52E-05    | MMP2, COL5A2                                                                                                                                                        |
| GO:0071230    | collagen fibril organization             | 6     | 1.28E-04    | COL1A1, COL3A1, COL1A2, COL4A1, MMP2, COL5A2                                                                                                                        |
| GO:0007179    | TGF $\beta$ receptor signaling           | 6     | 0.002831814 | KLF50, COL3A1, TGFBI, COL2A1, ADAM9, RPS27A                                                                                                                         |
| GO:0006457    | protein folding                          | 6     | 0.041307939 | CCT2, PPL1, VBP1, DCAF2, FKBP2, CCT4                                                                                                                                |
| GO:0008120    | transport                                | 4     | 0.014854339 | NDFU9B, NDFU9A, NDFU9C                                                                                                                                              |
| GO:0051352    | response to calcium ion                  | 4     | 0.027917328 | PENK, ADAM9, ANXA1, THBS1                                                                                                                                           |
| KEGG          |                                          |       |             |                                                                                                                                                                     |
| KEGG:hsa04151 | PI3K-Akt signaling pathway               | 16    | 3.02E-05    | PDGFRB, VEGFR, FN1, LAMC1, GNG12, GNG11, THBS1, COL3A1, COL1A1, COL1A2, COL5A1, COL4A1, COL5A2, DITPA, ITGA5, MCL1                                                  |
| KEGG:hsa04512 | Focal adhesion                           | 13    | 1.18E-06    | PDGFRB, VEGFR, FN1, LAMC1, THBS1, COL1A1, PPP1CC, COL3A1, COL1A2, COL5A1, COL4A1, COL5A2, FN1, ITGA5, LAMC1, COL5A1, COL4A1, COL5A2, FN1, ITGA5, LAMC1, THBS1, CD44 |
| KEGG:hsa04618 | atherosclerosis                          | 11    | 1.93E-07    | NDFU9B, NDFU9A, NDFU9C, NDFU9D, NDFU9E, NDFU9F, NDFU9G, NDFU9H, NDFU9I, NDFU9J, QSOX1, COX8B, SLC25A5, BIRC3                                                        |
| KEGG:hsa04619 | Huntington's disease                     | 8     | 0.015853651 | NDFU9B, NDFU9A, NDFU9C, NDFU9D, NDFU9E, NDFU9F, NDFU9G, NDFU9H, NDFU9I, NDFU9J, QSOX1                                                                               |
| KEGG:hsa05013 | Parkinson's disease                      | 7     | 0.009940243 | COX8B, SLC25A5                                                                                                                                                      |
| KEGG:hsa04514 | cell adhesion molecules                  | 6     | 0.00541457  | VCAN, SLR, HLA-C, ITGA5, CD81, JAM3                                                                                                                                 |
| KEGG:hsa04619 | Non-alcoholic fatty liver                | 6     | 0.045848783 | COX8B, SLC25A5, BIRC3                                                                                                                                               |

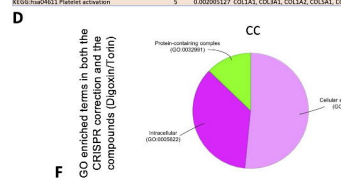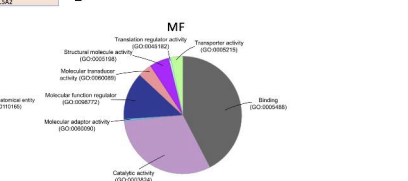

GO enriched terms in both the CRISPR correction and the compounds (Digoxin/Torin)

GO enriched terms in both the CRISPR correction and the compounds (Digoxin/Torin)

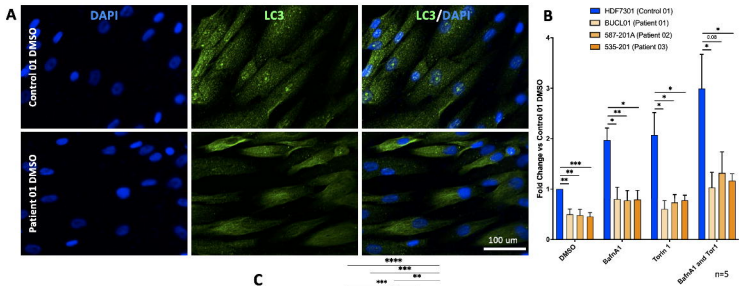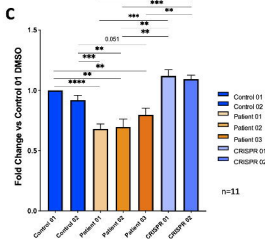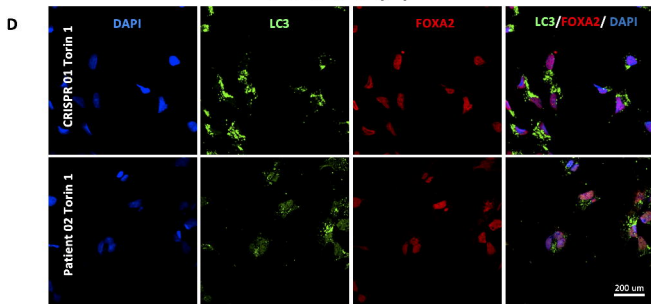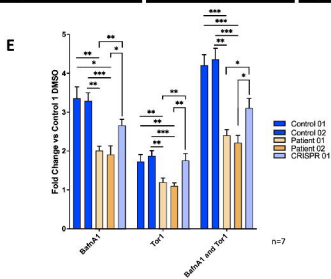

**A**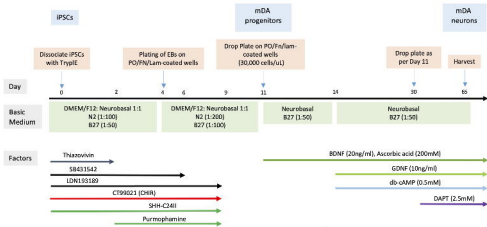**B**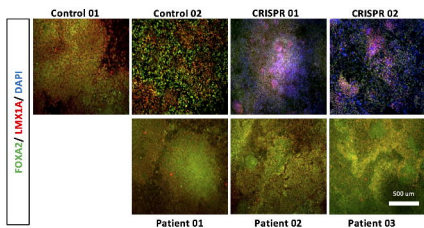**C**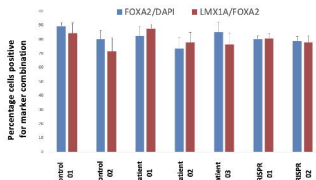**D**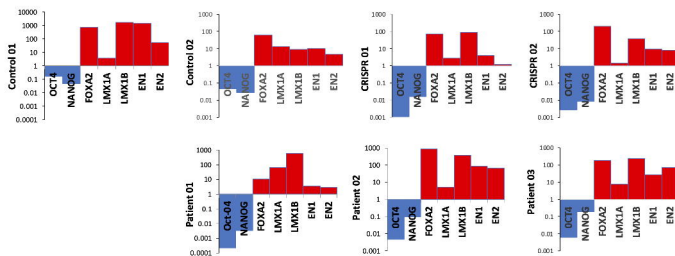**E**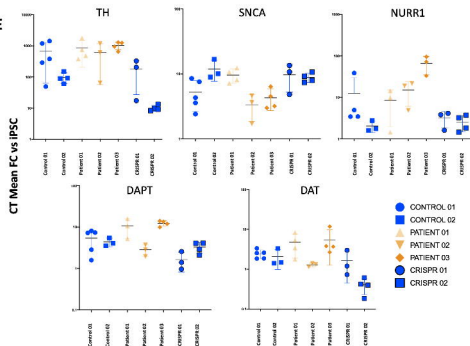**F**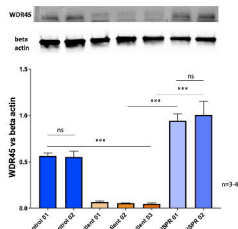

Supplement: NIHPP2023.09.13.556416V2-supplement-1.pdf [file NIHPP2023.09.13.556416V2-supplement-1.pdf]
